# Supplementary material for: KLF5 protects the intestinal epithelium against Th17 immune response in a murine colitis model
Source: PubMed Central journal article supplement (PMC9057631; doi:10.1172/jci.insight.153488), 2022-04-08
Supplement: jciinsight-7-153488-s064.pdf [file jciinsight-7-153488-s064.pdf]

1 **SUPPLEMENTAL FIGURE LEGENDS**

2 **Supplemental Figure 1: The effect of *Klf5* deletion on the intestinal phenotypes in male and**

3 **female mice.** (A) Kaplan-Meier curve of CO and TAM treatment for *Klf5<sup>ΔIND</sup>* mice with male (n=15)

4 and female (n=15) mice. (B) Quantification of clinical scores of CO- or TAM-treated *Klf5<sup>Ctrl</sup>* and

5 *Klf5<sup>ΔIND</sup>* male and female mice (n=10). Max for the clinical score is 12 and quantified with three

6 categories; stool consistency, weight loss, and fecal blood. (C) Hematoxylin-eosin staining of

7 whole colon tissue from *Klf5<sup>Ctrl</sup>* and *Klf5<sup>ΔIND</sup>* male mice treated with CO or TAM. (D) Quantification

8 of histological score of CO- and TAM-treated *Klf5<sup>Ctrl</sup>* and *Klf5<sup>ΔIND</sup>* male and female mice. Max for

9 the histological score is 11 and quantified with three categories; crypt damage, inflammatory cells

10 in lamina propria, and ulcers (n=10). (E) Hematoxylin-eosin staining of ileal tissue from *Klf5<sup>Ctrl</sup>* and

11 *Klf5<sup>ΔIND</sup>* male and female mice treated with CO or TAM. The red square highlights areas of villus

12 blunting in the small intestine of TAM-treated female *Klf5<sup>ΔIND</sup>* mice. Data from graphs represent

13 mean with SEM. \*\*P<0.01; \*\*\*P<0.001; One-way ANOVA. Scale Bars on images indicate 70μm.

14

15 **Supplemental Figure 2: Different recombination efficiencies of *Klf5* deletion between male**

16 **and female *Klf5<sup>ΔIND</sup>* mice.** (A) Immunohistochemical staining of KLF5 in whole colon tissues from

17 male *Klf5<sup>Ctrl</sup>* and *Klf5<sup>ΔIND</sup>* mice treated with CO or TAM. (B) RT-qPCR analysis of *Klf5* transcript

18 levels comparing TAM-treated over CO-treated *Klf5<sup>ΔIND</sup>* mice in male and female (n=9). (C) DNA

19 gel electrophoresis of PCR products from primers flanking *loxP* sites upstream of *Klf5* exon 2 and

20 *Actb*. Data from graph B represent mean, \*\*\*P<0.001; Unpaired T-test. Data from graph D

21 represent mean, \*P<0.05; \*\*\*P<0.001; One-way ANOVA. Scale bars on images indicate 70μm.

22

23 **Supplemental Figure 3: Comparison of transcriptional profiles between CO- or TAM-**

24 **treated *Klf5<sup>Ctrl</sup>* and *Klf5<sup>ΔIND</sup>* mice.** (A) RT-qPCR analysis comparing CO- to TAM-treated *Klf5<sup>Ctrl</sup>*

25 mice (n=3). (B) RT-qPCR analysis comparing CO-treated *Klf5<sup>Ctrl</sup>* mice, and CO-treated *Klf5<sup>ΔIND</sup>*

1 mice (n=3). (C) RT-qPCR analysis comparing TAM-treated *Klf5<sup>Ctrl</sup>* mice and TAM-treated  
2 *Klf5<sup>ΔIND</sup>* mice (n=3). (D) GSEA pathway analysis positively correlated to CO-treated *Klf5<sup>ΔIND</sup>*  
3 mice. Data from graphs represent mean with SEM. \*\*\*P<0.001; Unpaired T-test.  
4

5 **Supplemental Figure 4: Gating strategy for pan-leukocyte flow analysis.** Gating strategy for  
6 identification of CD45, neutrophil, B cell, T cell, NK cells, monocytes, macrophages, and dendritic  
7 cells.  
8

9 **Supplemental Figure 5: Comparison of additional leukocyte populations between CO- or**  
10 **TAM-treated *Klf5<sup>Ctrl</sup>* and *Klf5<sup>ΔIND</sup>* mice.** (A) NK cells, (B) B cells, (C) monocytes, (D) neutrophils,  
11 (E) macrophages, (F) cDC1, (G) Th1, (H) Th2, and (I) ILC3 cells (n=4). (J) 40X brightfield image  
12 of ileum and colon of TAM-treated *Klf5<sup>ΔIND</sup>* mice. Red arrows highlight neutrophil involvement in  
13 cryptitis and crypt abscesses. Data from graphs represent mean with SEM. The small intestine  
14 image of TAM-treated *Klf5<sup>ΔIND</sup>* mice in Supplemental Figure 5J is a zoomed-in image of a section  
15 of the ileal sample from TAM-treated female *Klf5<sup>ΔIND</sup>* mice in Supplemental Figure 1E. One-way  
16 ANOVA. Scale Bar represents 70 μm.  
17

18 **Supplemental Figure 6: Comparison of Th17-inducing factors between CO- or TAM-treated**  
19 ***Klf5<sup>ΔIND</sup>* mice.** *Klf5<sup>ΔIND</sup>* mice were treated with CO or TAM for five days and RT-qPCR analysis  
20 performed on whole colon tissues for (A) IL-1β, (B) IL-23, and (C) SAA. Cytokine array analyses  
21 were performed at days 1 and 5 of CO or TAM treatment for (D) IL-1β, (E) IL-23, and (F) SAA.  
22 (G) ELISA of IL-23 concentrations on days 1, 3, 5, and 7 following CO or TAM treatment. Data  
23 from graphs A-F represent mean, \*P<0.05; \*\*P<0.01; One-way ANOVA test. Data from graph G  
24 represent mean, \*\*\*\*P<0.0001; Two-way ANOVA test.  
25

1

2 **Supplemental Figure 7: Effects of *Klf5* deletion on pSTAT3-related upstream and**

3 **downstream signaling pathways.** (A) Immunohistochemical staining of STAT3 and

4 phosphorylated STAT3 in the colon of CO- or TAM-treated *Klf5*<sup>ΔIND</sup> mice. Scale bars on images

5 indicate 70μm. The pSTAT3 images are lower magnifications of the same images shown in

6 Figure 6A. (B) Quantification of percentage of pSTAT3<sup>+</sup> cells per crypt (n=5). (C) RNA-seq (left

7 graph; n=4) and RT-qPCR (right graph; n=7) analysis of IL-22RA1 transcript levels. (D) RNA-

8 seq (left graph; n=4) and RT-qPCR (right graph; n=6) analysis of IL-22RA2 levels. (E) RNA-seq

9 TPM fold-change for S100A8, S100A9, b-defensin-2, and SOCS3 (n=4). Data from graph B

10 represent mean. \*\*\*P<0.001; One-way ANOVA test. Data from graph C-E represent mean by

11 unpaired T-test. Scale bar represents 70μm.

12

13 **Supplemental Figure 8: Effect of KLF5 deletion on pSTAT3 localization in response to IL-**

14 **6.** IF staining of DAPI and pSTAT3 of C2BBE<sup>Ctrl</sup> and C2BBE<sup>ΔIND</sup> cells treated with DMSO or

15 DOX and PBS or IL-6. Scale bar represents 70μm.

16

17 **Supplemental Figure 9: Cellular localization of pSTAT3 in human colonic specimens.** IHC

18 staining of pSTAT3 in colonic biopsy specimens from normal subject, UC patient, and patient

19 with colon adenocarcinoma. Scale bars represent 70μm.

20

21 **Supplemental Figure 10: The role of KLF5 in the maintenance and survival of colonoids.**

22 (A) Western blots and (B) quantification of KLF5 levels in colonoid cultures from *Klf5*<sup>ΔIND</sup> mice

23 treated with PBS or 4-OHT (n=6). (C) Bright field images of colonoid culture from days 1, 3, and

24 5 of treatment with PBS or 4-OHT. Scale bars on images indicate 70μm. (D) Quantification of

25 percentages of budding colonoids over total number of colonoids on days 0, 1, 3, and 5 (n=8).

1 Data from graph B represent mean. \*\*\*\*P<0.001; Unpaired T-test. Data from graph D represent  
2 mean, \*P<0.05; \*\*P<0.01; Two-way ANOVA. Scale bars on images indicate 70µm.

3

4 **Supplemental Figure 11: Effect of IL-22 on survivability of colonoids derived from *Klf5<sup>ΔIND</sup>***

5 **mice.** (A) Bright field images of *Klf5<sup>ΔIND</sup>* colonoid cultures from days 1 and 5 of treatment with PBS  
6 or 4OHT. Scale bars represent 70µm. (B) Quantification of percentages of budding colonoids over  
7 total number of colonoids on days 1 and 5 (n=10). Data from graph B represent mean, \*P<0.05;  
8 \*\*P<0.01; Two-way ANOVA.

9

10 **Supplemental Figure 12: Comparison of phylogenetic classes in colonic microbiota**

11 **between CO- and TAM-treated *Klf5<sup>ΔIND</sup>* mice.** Linear discriminant analysis of 16s rRNA

12 sequencing in the microbiota from the colon of CO- and TAM-treated *Klf5<sup>ΔIND</sup>* mice (n=9).

13

14 **Supplemental Figure 13: Comparison of colonic microbiota abundance in CO- or TAM-**

15 **treated mice.** (A) Phylogenetic tree of LDA analysis comparing TAM-treated *Klf5<sup>Ctrl</sup>* and *Klf5<sup>ΔIND</sup>*

16 mice (n=9). (B) LDA score graph showing significantly different phylogenetic orders between

17 TAM treated *Klf5<sup>Ctrl</sup>* and *Klf5<sup>ΔIND</sup>* mice (n=4). (C) Phylogenetic tree of LDA analysis comparing

18 CO- and TAM-treated *Klf5<sup>Ctrl</sup>* mice. (D) LDA score graph showing significantly different

19 phylogenetic orders between CO and TAM treated *Klf5<sup>Ctrl</sup>* mice (n=4). (E) Phylogenetic tree of

20 LDA analysis comparing CO treated *Klf5<sup>Ctrl</sup>* and *Klf5<sup>ΔIND</sup>* mice. (F) LDA score graph showing

21 significantly different phylogenetic orders between CO treated *Klf5<sup>Ctrl</sup>* and *Klf5<sup>ΔIND</sup>* mice (n=9).

22

23 **Supplemental Figure 14: Effect of *Klf5* deletion on abundance of two Th17 pathobionts.**

24 qPCR analysis of 16s rRNA of segmented filamentous bacteria (SFB) (A) and Bacteroides (BAT)

1 (B) in the colon of CO- or TAM-treated mice (n=6). Data from graph represent mean. \*P<0.05;  
2 \*\*P<0.01; One-way ANOVA.

3

4 **Supplemental Figure 15: Effect of antibiotic treatment on the weight of CO- and TAM-**  
5 **treated *Klf5*<sup>ΔIND</sup> mice.** (A) Raw quantification of weight for each mouse in the experiment (n=3).  
6 (B) IHC staining of KLF5 in proximal and distal colons from CO- and TAM-treated *Klf5*<sup>ΔIND</sup> mice  
7 with water or antibiotic treatment. Scale Bars on images indicate 70μm.

8

9

#### 10 **SUPPLEMENTAL TABLE LEGENDS**

11 **Supplemental Table 1: List of fluorophore-conjugated antibodies for FACS analysis.** and  
12 Catalog number, clone, and fluorophores are listed to the right of each antibody marker.

13

14 **Supplemental Table 2: List of primary antibodies used for IF staining and western blot.** The  
15 catalog number, clone, and concentrations used for each type of staining protocol.

16

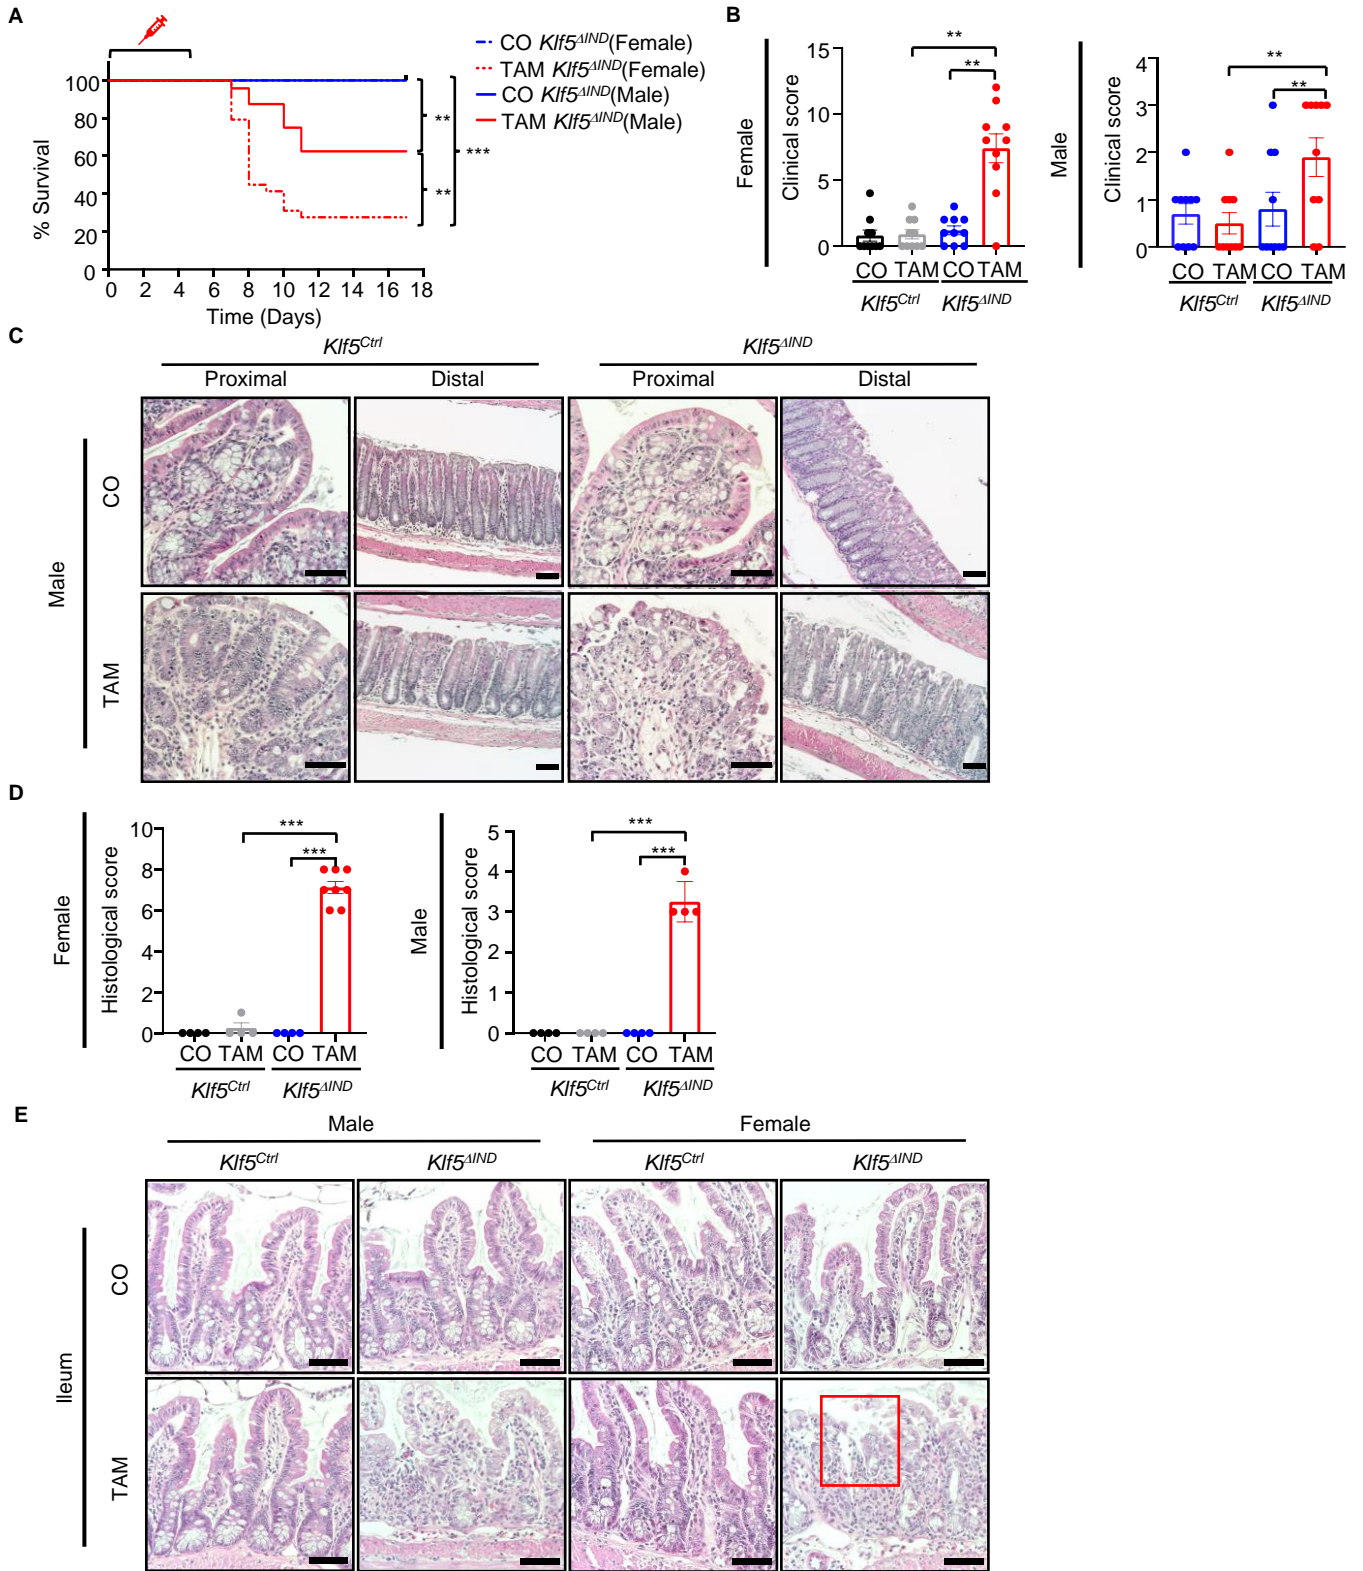

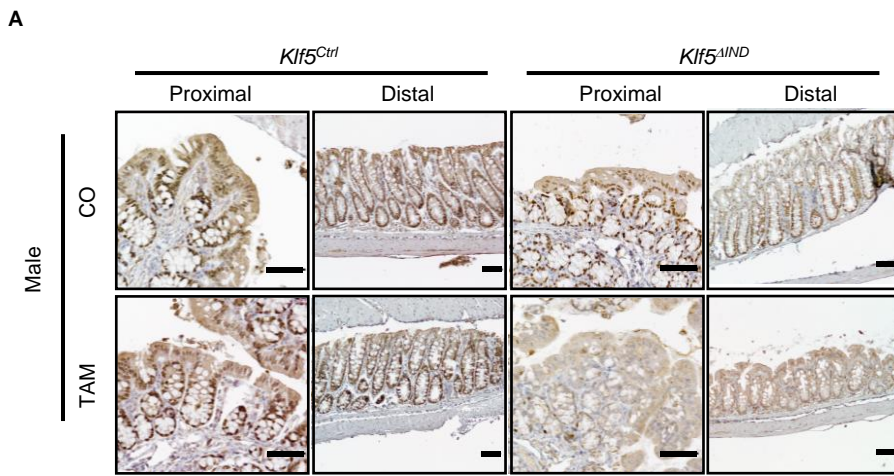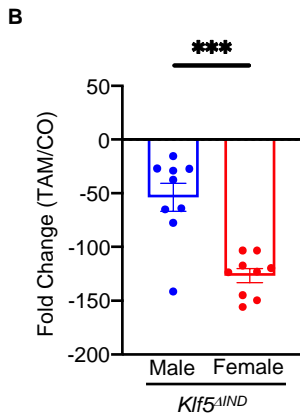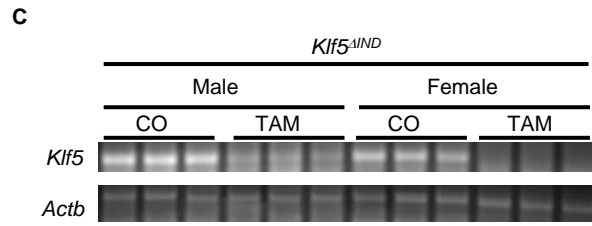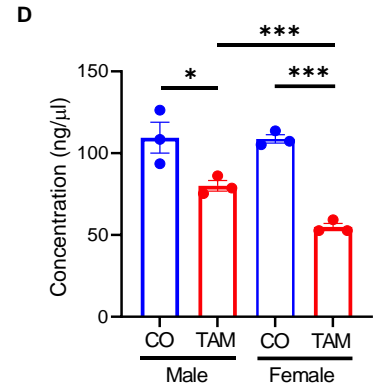

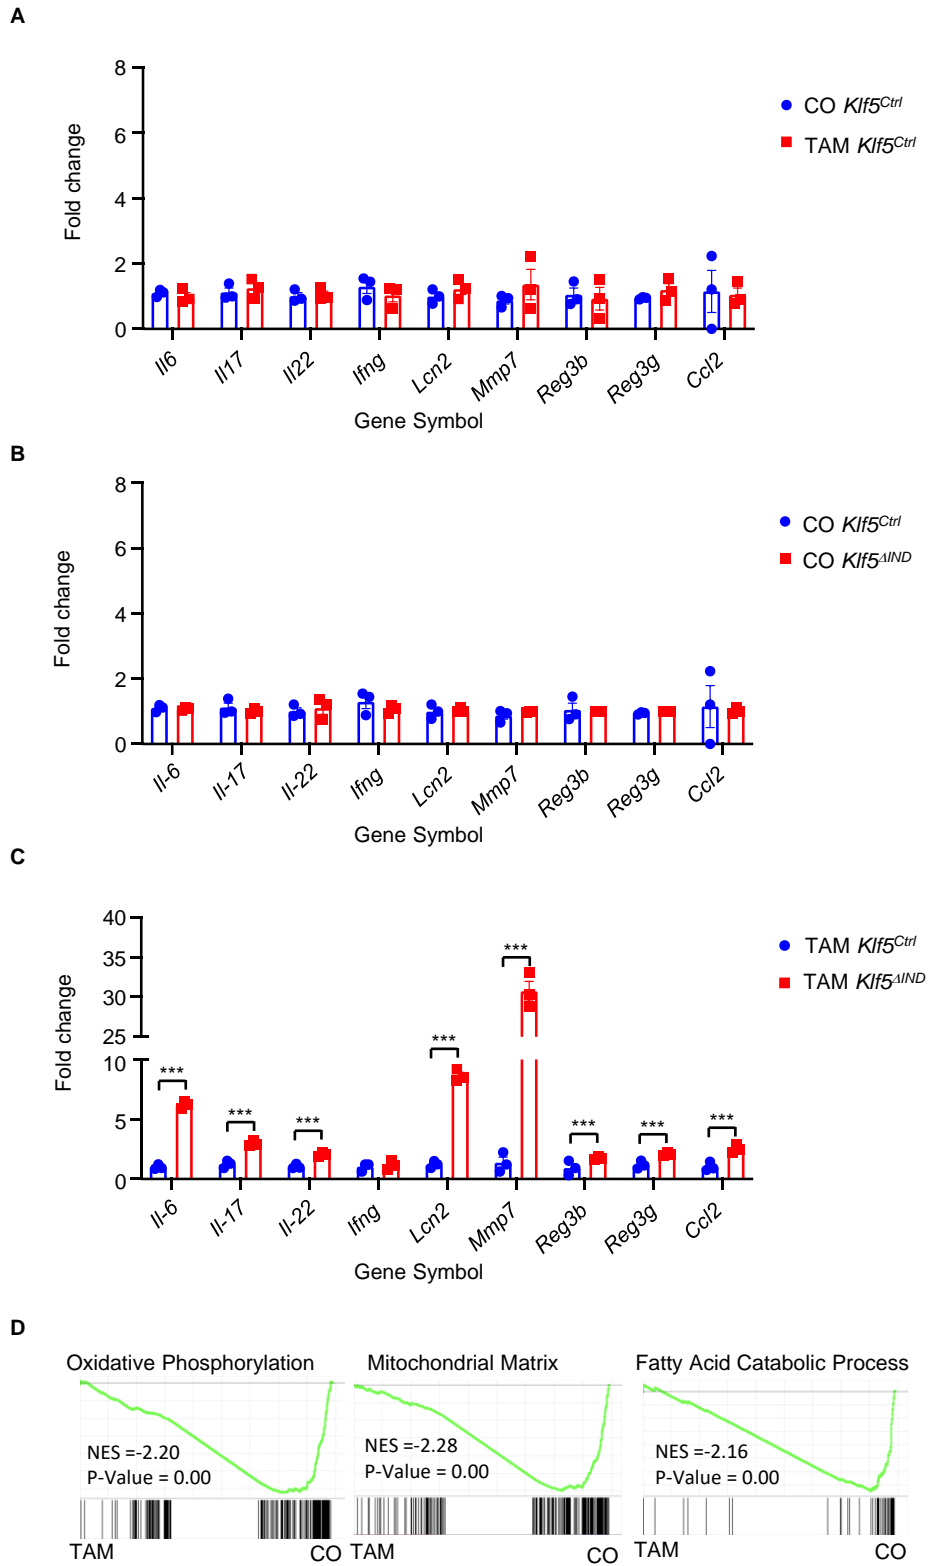



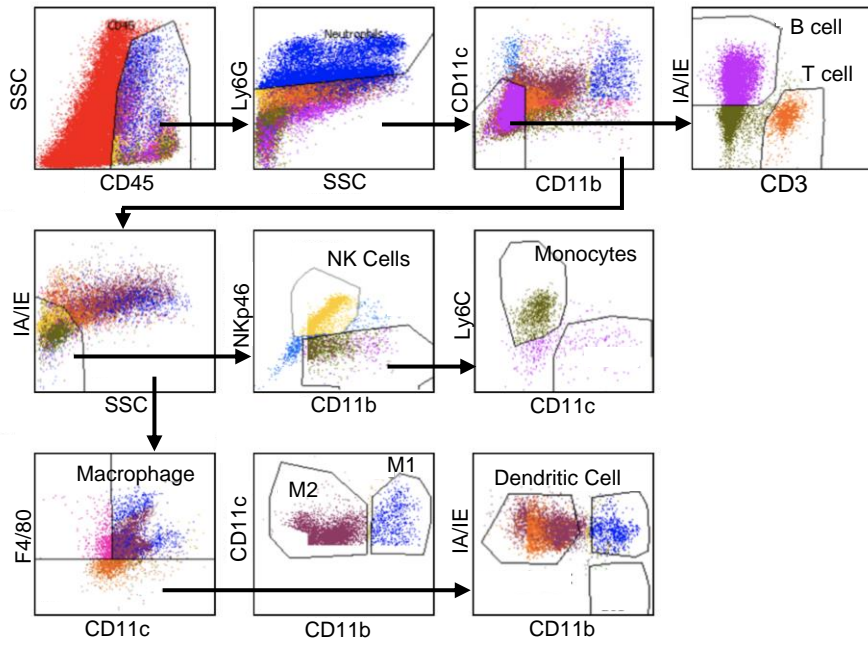

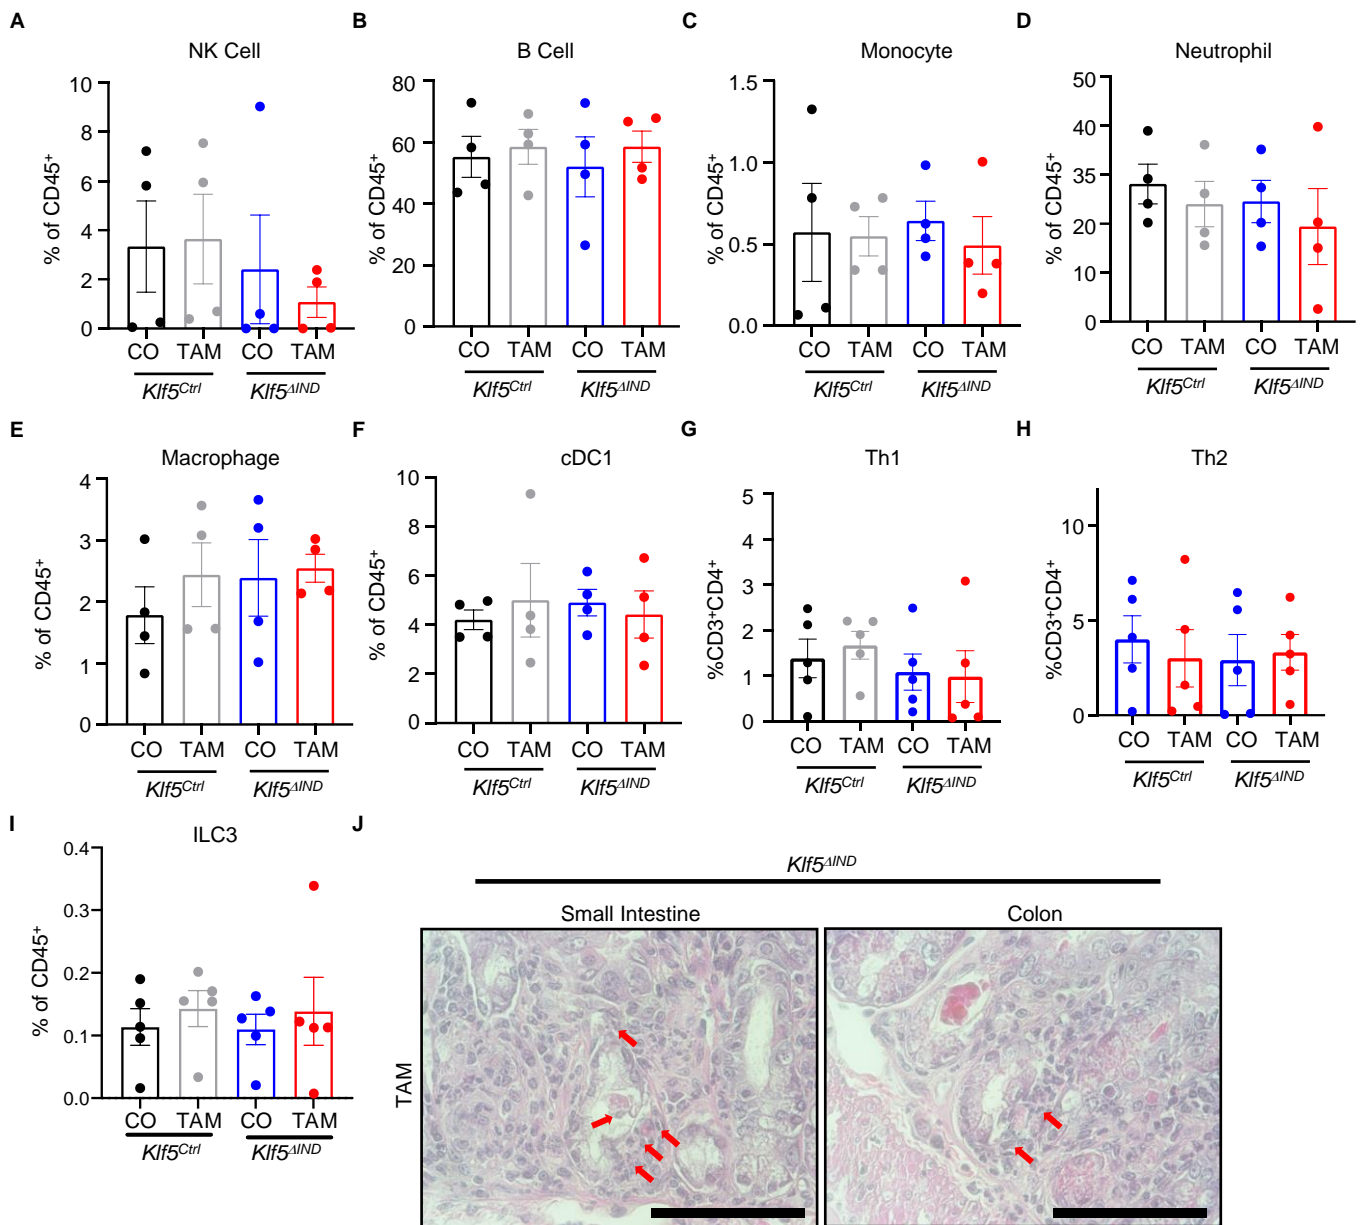

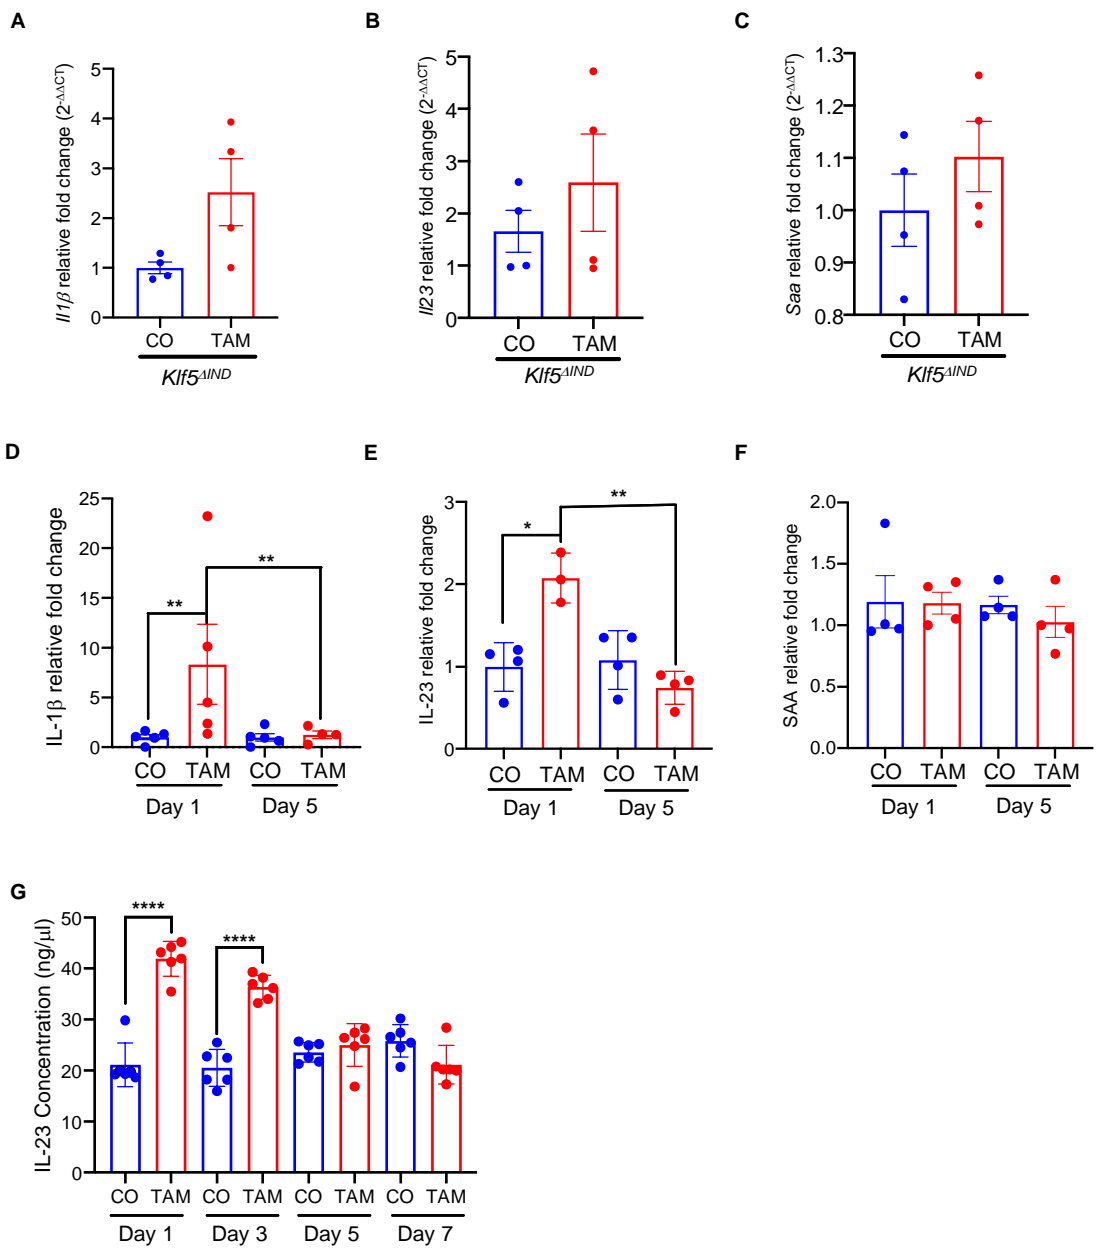



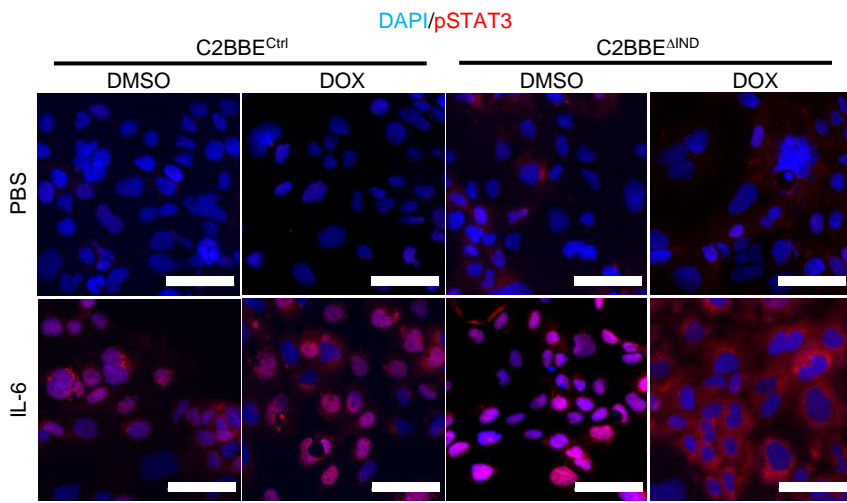

Normal

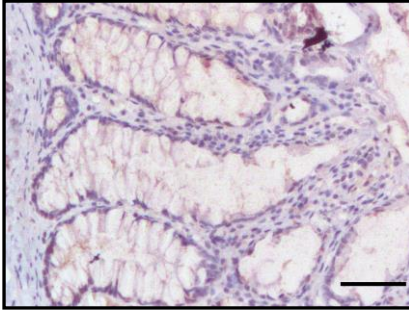

UC Patient

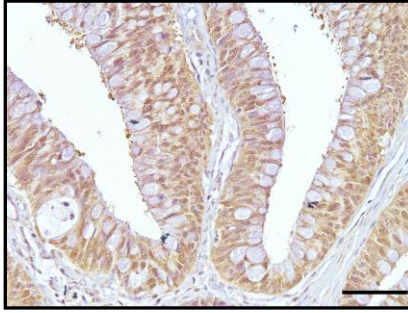

Colon Adenocarcinoma

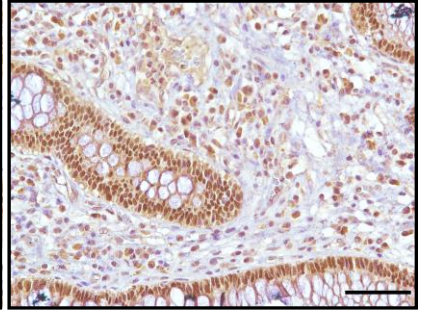

A

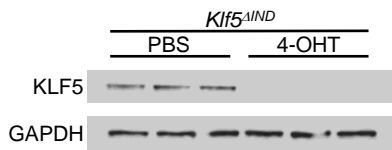

B

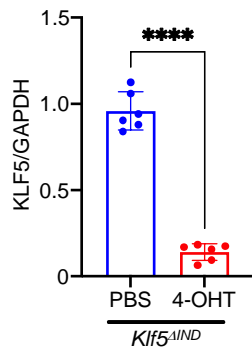

C

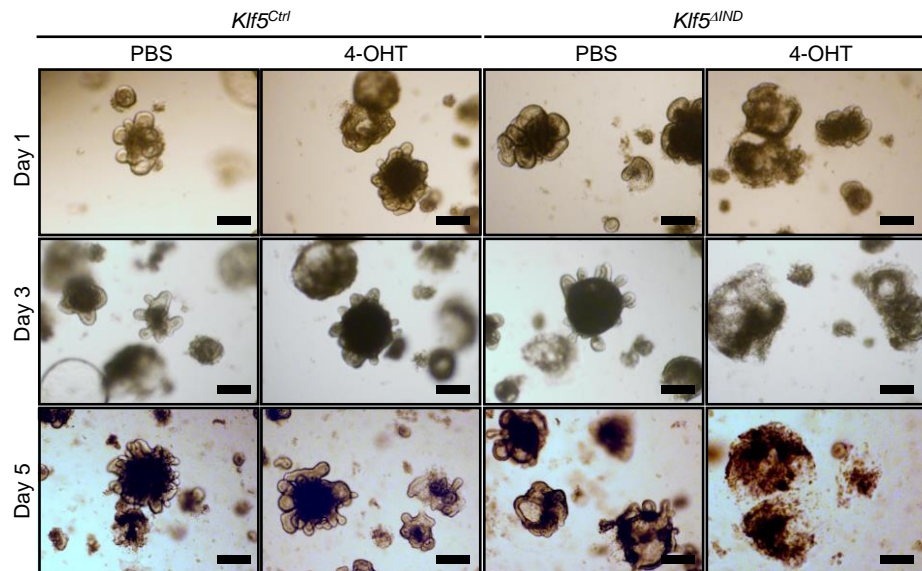

D

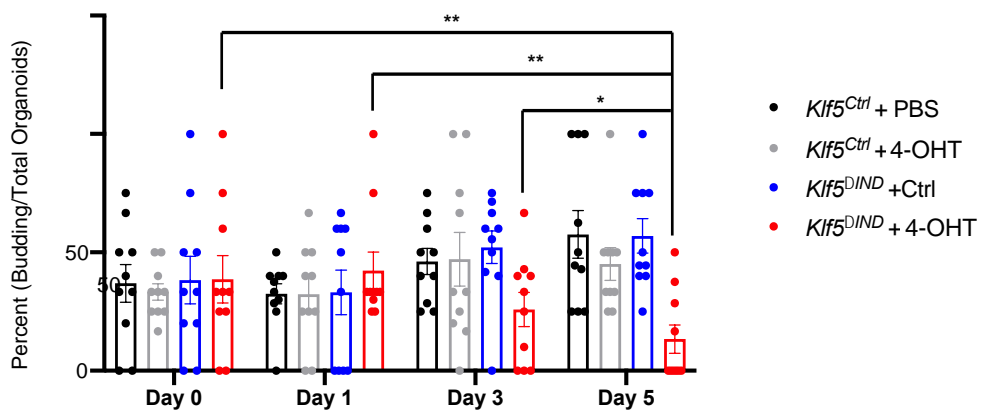

A

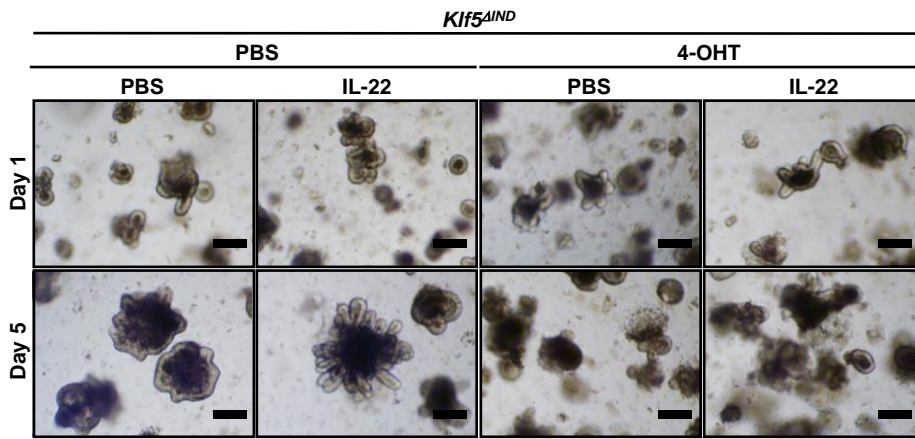

B

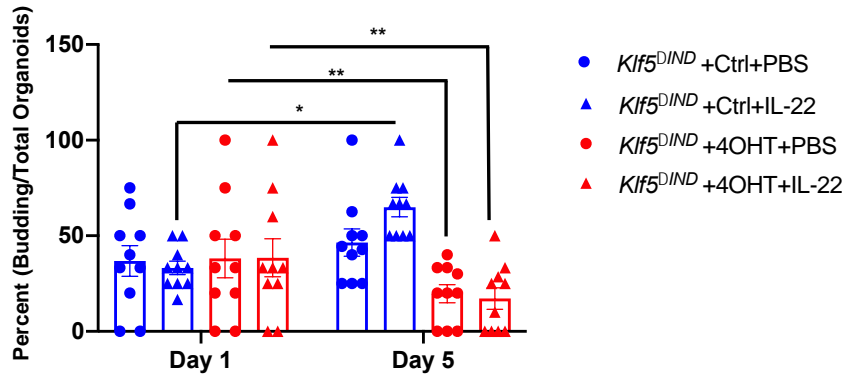



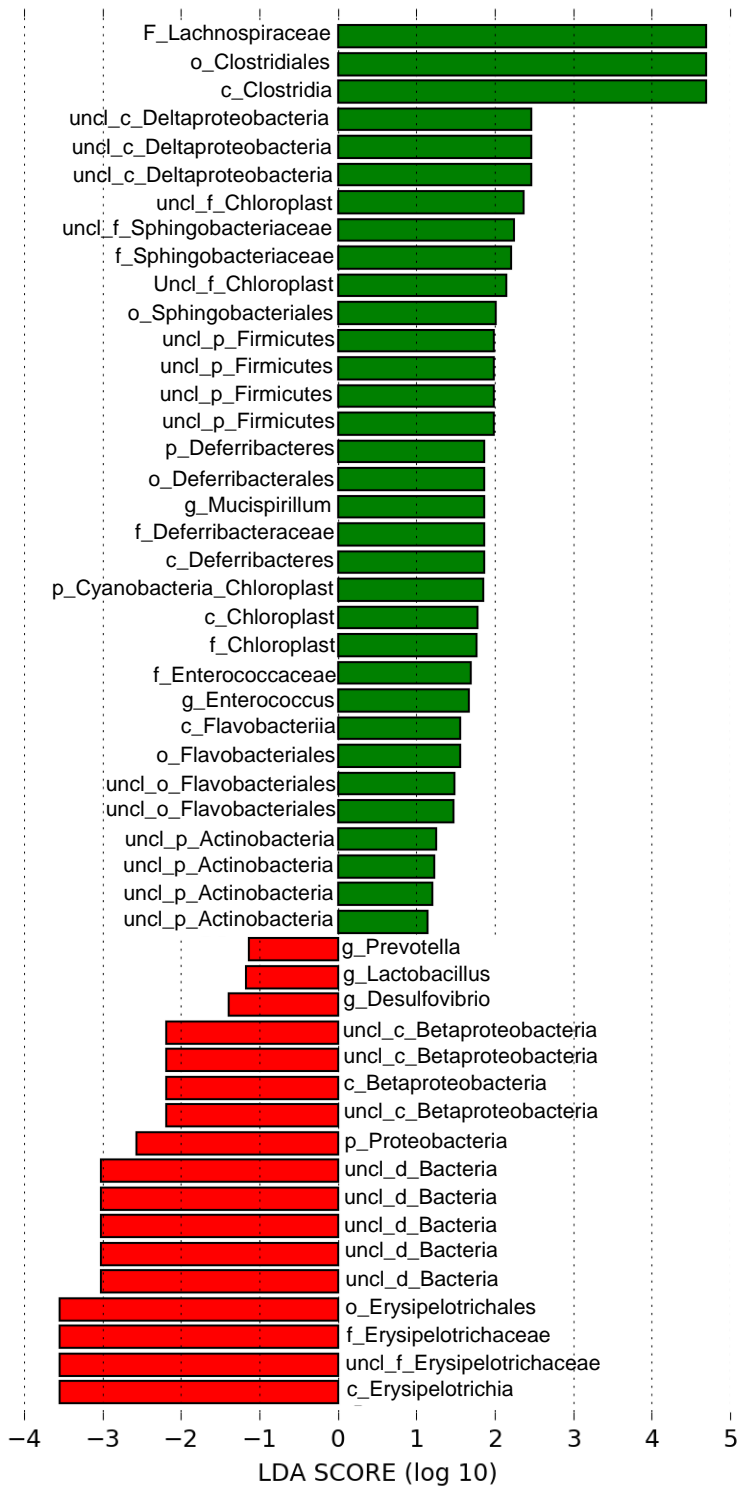

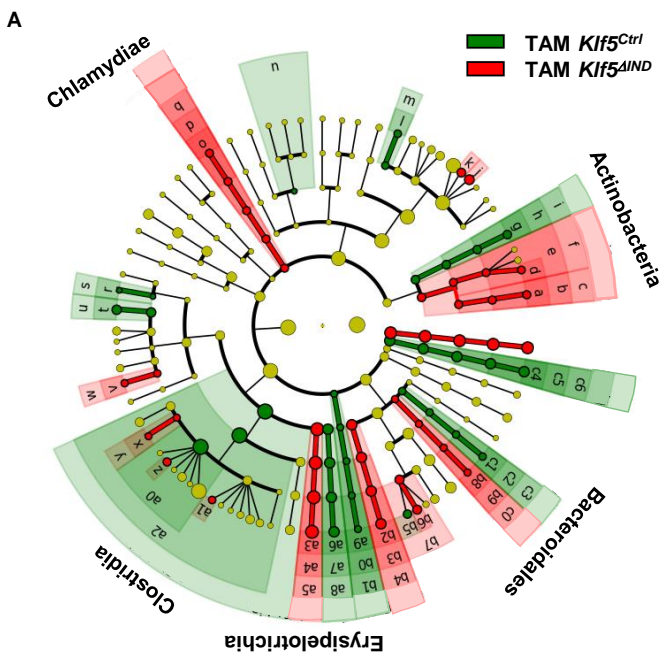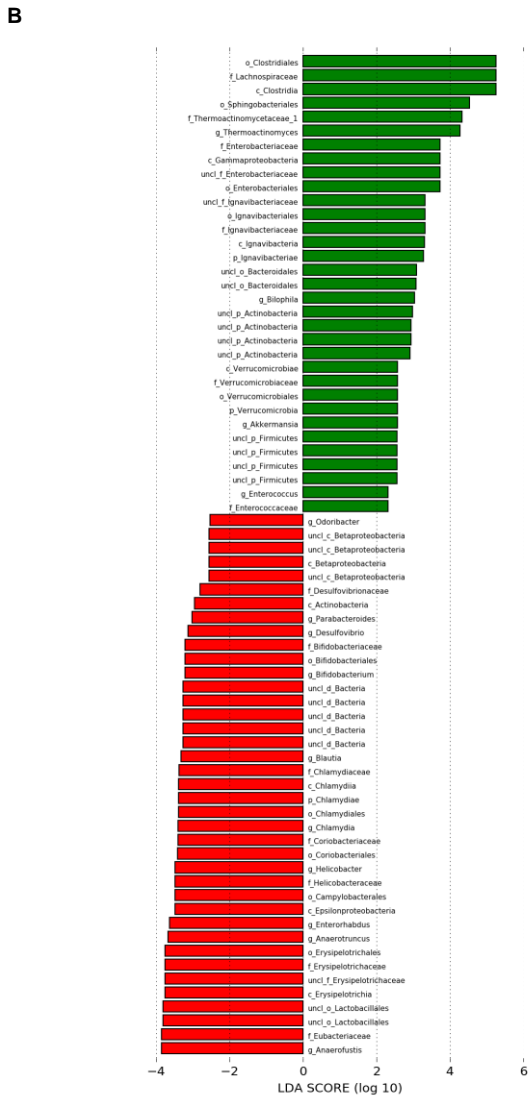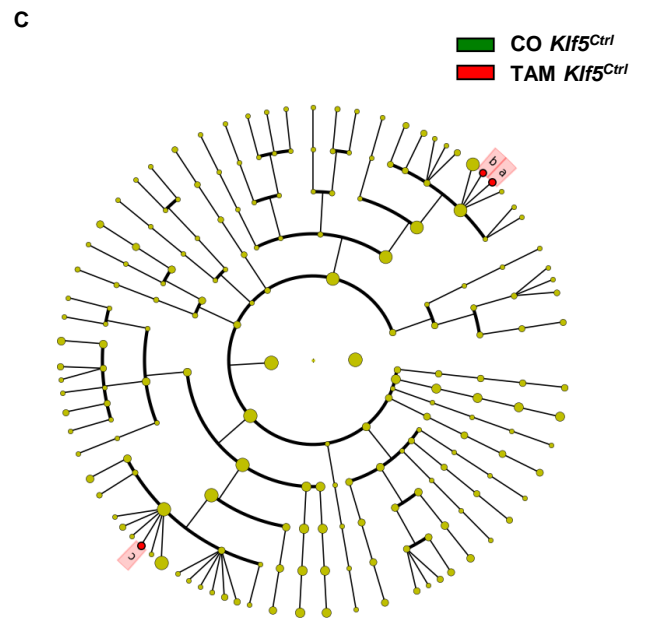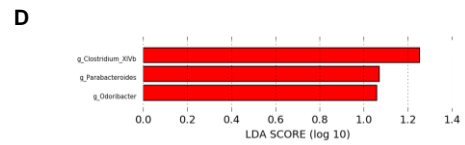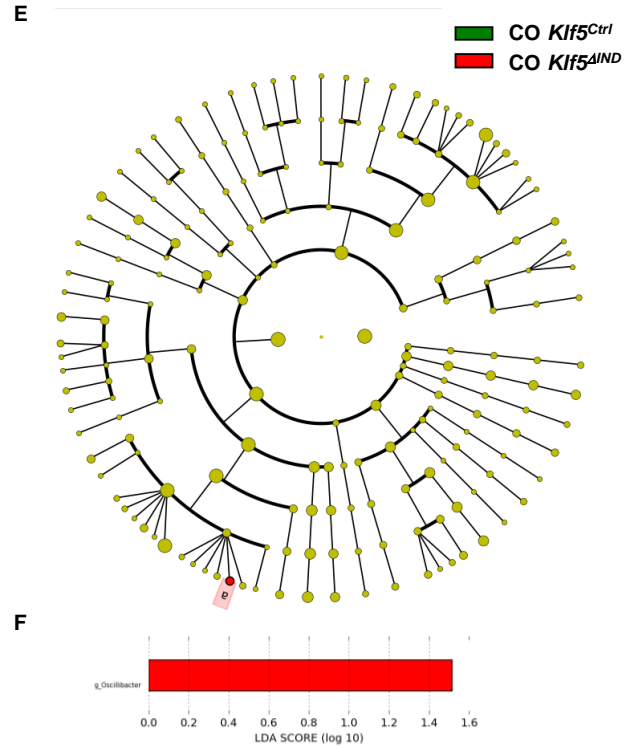

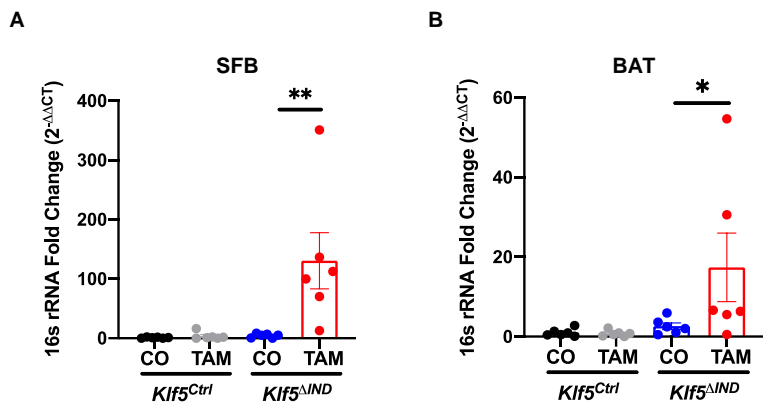

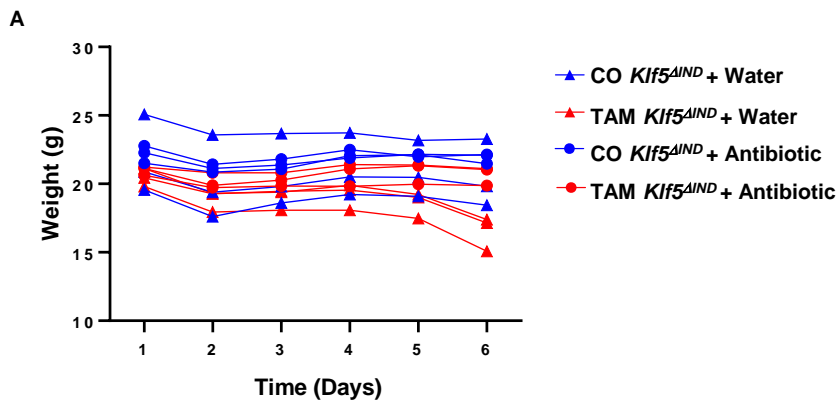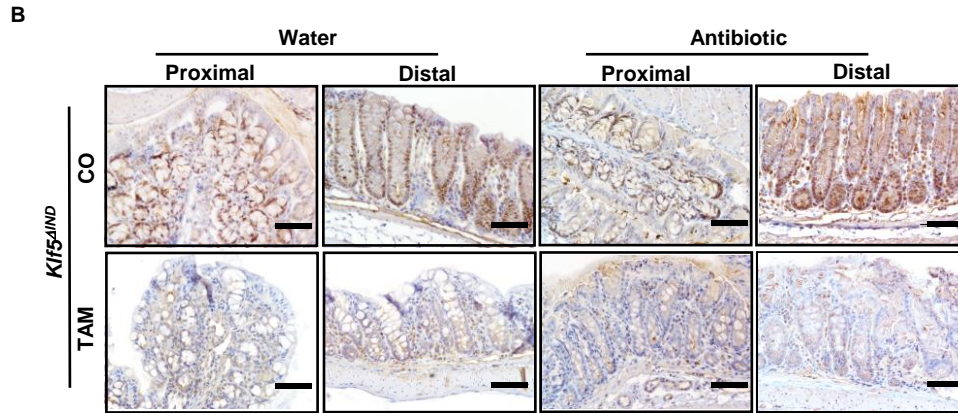

| <b>Antibodies</b> | <b>Catalog No. and Company</b> | <b>Clone</b> | <b>Fluorophore</b> |
|-------------------|--------------------------------|--------------|--------------------|
| CD45              | 103122, Biolegend              | 30-F11       | APC                |
| Ly6C              | 128016, Biolegend              | HK1.4        | FITC               |
| IA/IE (MHCII)     | 107645, Biolegend              | M5/114.15.2  | PerCP 5.5          |
| CD11c             | 117308, Biolegend              | N418         | PE                 |
| Ly6G              | 127618, Biolegend              | 1A8          | PE/Cy7             |
| F4/80             | 123131, Biolegend              | BM8          | BV421              |
| NKp46             | 137619, Biolegend              | 29A1.4       | BV605              |
| CD11b             | 101259, Biolegend              | M1/70        | BV650              |
| FoxP3             | 15-5773-80, Thermo Fisher      | FJK-16s      | PECy5              |
| RORgT             | 12-6981-82, Thermo Fisher      | B2D          | PE                 |
| GATA3             | 653813, Biolegend              | 16E10A23     | BV421              |
| CD3               | 100229, Biolegend              | 17A2         | BV650              |
| CD8b              | 100229, BD                     | H35-17.2     | BV786              |
| CD4               | 100425, Biolegend              | GK1.5        | FITC               |
| CD4               | 100429, Biolegend              | GK1.5        | AF700              |
| CD4               | 100426, Biolegend              | GK1.5        | APC                |
| CD4               | 100433                         | GK1.5        | PerCP/Cy5.5        |
| CD4               | 100407, Biolegend              | GK1.5        | PE                 |
| CD4               | 100409, Biolegend              | GK1.5        | PE/Cy5             |
| CD4               | 100421, Biolegend              | GK1.5        | PE/Cy7             |
| CD4               | 100437, Biolegend              | GK1.5        | BV421              |
| CD4               | 100451, Biolegend              | GK1.5        | BV605              |
| CD4               | 100469, Biolegend              | GK1.5        | BV650              |
| CD4               | 100453, Biolegend              | GK1.5        | BV785              |
| CD326             | 118211, Biolegend              | G8.8         | AF647              |
| pSTAT3            | sc-8059 AF488, Santa Cruz      | B-7          | FITC               |
| STAT3             | 678007, VWR                    | 4G4B45       | PE                 |

| <b>Antibodies</b>              | <b>Catalog No. and Company</b> | <b>Clone</b> | <b>Western Blot</b>                | <b>Immunofluorescence/<br/>Immunohistochemistry</b> |
|--------------------------------|--------------------------------|--------------|------------------------------------|-----------------------------------------------------|
| Rabbit Anti-STAT3              | 4904L, Cell Signaling          | 79D7         | 1:1000 diluted in 5% Milk          | 1:100 diluted in 5% BSA w/<br>TTBS                  |
| Rabbit Anti-pSTAT3<br>(Tyr705) | 9145L, Cell Signaling          | D3A7         | 1:1000 diluted in 5% BSA<br>w/ PBS | 1:100 diluted in 5% BSA w/<br>TTBS                  |
| Rabbit Anti-KLF5               | Ab137676, Abcam                | Polyclonal   | 1:2000 diluted in 5% Milk          | 1:200 diluted in 5% BSA w/<br>TTBS                  |
| Mouse Anti-GAPDH               | CB1001, EMD Millipore          | 6C5          | 1:3000 diluted in 5% Milk          | N/A                                                 |
| Rabbit Anti-H3                 | Ab1791, Abcam                  | Polyclonal   | 1:3000 diluted in 5% Milk          | N/A                                                 |
| Rabbit Anti-IL-17A             | Ab79056, Abcam                 | Polyclonal   | N/A                                | 1:100 diluted in 5% BSA w/<br>TTBS                  |
| Rabbit Anti-IL-22              | Ab18564, Abcam                 | Polyclonal   | N/A                                | 1:100 diluted in 5% BSA w/<br>TTBS                  |
| Mouse Anti-PanCK               | CM011B, Biocare Medical        | AE1/AE3      | N/A                                | Prediluted                                          |
| Rabbit Anti-Ki-67              | NB500, Novus Biologicals       | Polyclonal   | N/A                                | 1:200 diluted in 5% BSA w/<br>TTBS                  |
| Anti-HA                        | Sc-7392, Santa Cruz            | F-7          | 1:1000 diluted in 5% Milk          | N/A                                                 |
| EdU Kit                        | C10639, Thermo Scientific      | N/A          | N/A                                | Kit Manual                                          |
